# Supplementary material for: An Innovative Test for the Rapid Detection of Specific IgG Antibodies in Human Whole-Blood for the Diagnosis of Opisthorchis viverrini Infection
Source: MDPI journal article supplement (doi:10.3390/tropicalmed7100308), 2022-10-17
Supplement: s1 [file s1]

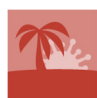

# Supplementary Materials for An Innovative Test for the Rapid Detection of Specific IgG Antibodies in Human Whole-Blood for the Diagnosis of *Opisthorchis viverrini* Infection

**Table S1.** Evaluation of the OvB-test kit using the EDTA anti-coagulated whole blood samples from the field.

| No. | Parasitosis*                                         | EPG** | Level in OvB-test kit*** |
|-----|------------------------------------------------------|-------|--------------------------|
| 1   | Opisthorchiasis                                      | 18    | <2                       |
| 2   | Opisthorchiasis                                      | 68    | 0.5                      |
| 3   | Opisthorchiasis                                      | 16    | 0.5                      |
| 4   | Opisthorchiasis                                      | 10    | 0.5                      |
| 5   | Opisthorchiasis                                      | 23    | <3                       |
| 6   | Opisthorchiasis                                      | 44    | 0.5                      |
| 7   | Opisthorchiasis                                      | 26    | 0.5                      |
| 8   | Opisthorchiasis                                      | 12    | 2                        |
| 9   | Opisthorchiasis                                      | 38    | 1                        |
| 10  | Opisthorchiasis                                      | 21    | 0.5                      |
| 11  | Non-infected individual                              | 0     | Negative                 |
| 12  | Non-infected individual                              | 0     | Negative                 |
| 13  | Non-infected individual                              | 0     | Negative                 |
| 14  | Non-infected individual                              | 0     | Negative                 |
| 15  | Non-infected individual                              | 0     | Negative                 |
| 16  | Non-infected individual                              | 0     | Negative                 |
| 17  | Non-infected individual                              | 0     | Negative                 |
| 18  | Non-infected individual                              | 0     | Negative                 |
| 19  | Non-infected individual                              | 0     | Negative                 |
| 20  | Non-infected individual                              | 0     | Negative                 |
| 21  | Blastocystosis                                       | 0     | Negative                 |
| 22  | Blastocystosis                                       | 0     | Negative                 |
| 23  | <i>Entamoeba coli</i> infection                      | 0     | Negative                 |
| 24  | <i>Entamoeba coli</i> infection and strongyloidiasis | 0     | Negative                 |
| 25  | Lecithodendriid fluke infections                     | 14*** | Negative                 |
| 26  | Taeniasis                                            | 0     | Negative                 |
| 27  | Hymenolepiasis ( <i>Hymenolepis diminuta</i> )       | 136   | Negative                 |
| 28  | Hymenolepiasis ( <i>Hymenolepis nana</i> )           | 20    | Negative                 |
| 29  | Blastocystosis and lecithodendriid fluke infections  | 14*** | 0.5                      |
| 30  | Sarcocystosis and Blastocystosis                     | 0     | Negative                 |
| 31  | Strongyloidiasis                                     | 0     | Negative                 |
| 32  | Strongyloidiasis                                     | 0     | Negative                 |
| 33  | Strongyloidiasis                                     | 0     | 0.5                      |
| 34  | Strongyloidiasis                                     | 0     | Negative                 |
| 35  | Strongyloidiasis                                     | 0     | Negative                 |
| 36  | Strongyloidiasis                                     | 0     | Negative                 |
| 37  | Strongyloidiasis                                     | 0     | Negative                 |
| 38  | Strongyloidiasis                                     | 0     | Negative                 |
| 39  | Strongyloidiasis                                     | 0     | Negative                 |
| 40  | Strongyloidiasis                                     | 0     | 0.5                      |

\*Diagnosed by the modified formalin ethyl acetate concentration method [1]. \*\* Parasite egg count (EPG). \*\*\* Lecithodendriid fluke (EPG). \*\*\*\* Color band intensity (cut-off  $\geq 0.5$ ). No. 31-40, ten strongyloidiasis cases were used to evaluate due to high incidence infection in Khon Kaen Province.

## Reference

- Elkins, D.B.; Haswell-Elkins, M.; Anderson, R.M. The epidemiology and control of intestinal helminths in the Pulicat Lake region of Southern India. I. Study design and pre- and post-treatment observations on *Ascaris lumbricoides* infection. *Trans. R. Soc. Trop. Med. Hyg.* **1986**, *80*, 774-792. [https://doi.org/10.1016/0035-9203\(86\)90384-6](https://doi.org/10.1016/0035-9203(86)90384-6).
